# Supplementary material for: Endothelialization of an ePTFE vessel prosthesis modified with an antithrombogenic fibrin/heparin coating enriched with bound growth factors
Source: Royal Society of Chemistry journal article supplement (doi:10.1039/d1ra00053e), 2021-01-01
Supplement: d1ra00053e1.pdf [file d1ra00053e1.pdf]

## Electronic Supplementary Information

Endothelialisation of ePTFE vessel prosthesis modified with an antithrombogenic  
fibrin/heparin coating enriched with bound growth factors

J. Tábořská<sup>1</sup>, Z. Riedelová<sup>1</sup>, E. Brynda<sup>1</sup>, P. Májek<sup>2</sup>, T. Riedel<sup>1\*</sup>

<sup>1</sup>Institute of Macromolecular Chemistry, Czech Academy of Sciences

<sup>2</sup>Institute of Haematology and Blood Transfusion\*

Corresponding author: [riedel@imc.cas.cz](mailto:riedel@imc.cas.cz)

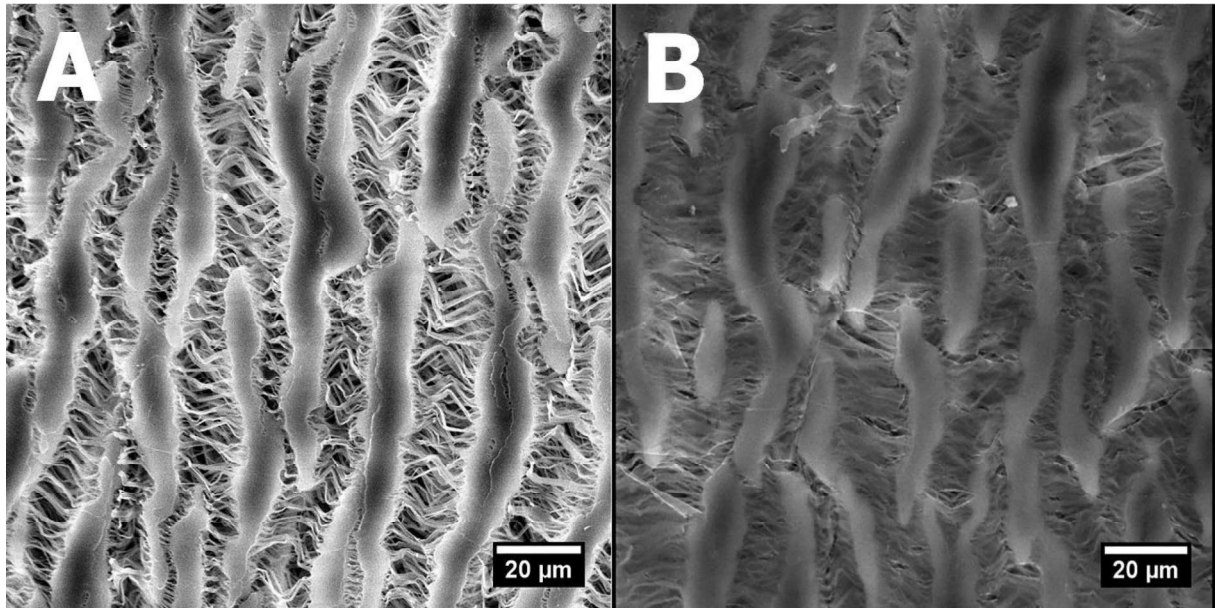

**Figure S1.** Fb coatings on ePTFE vessel prosthesis. A) inner surface of unmodified ePTFE prosthesis; B) inner surface of Fb coated prosthesis obtained using scanning electron microscopy (SEM).

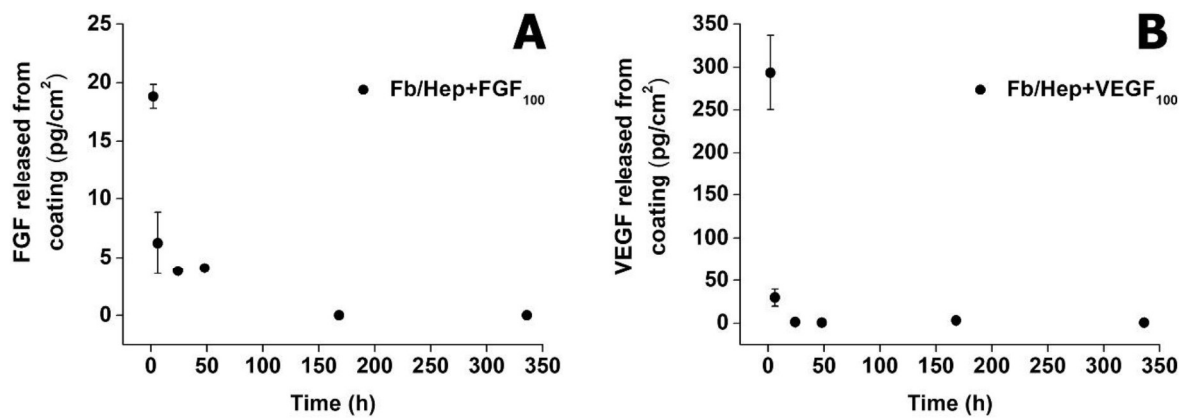

**Figure S2.** Release of growth factors from Fb/Hep coatings into PBS. The coatings were prepared on glass from solutions containing 100 ng/ml of VEGF or FGF. The error bars represent standard deviation of the mean (n=3).

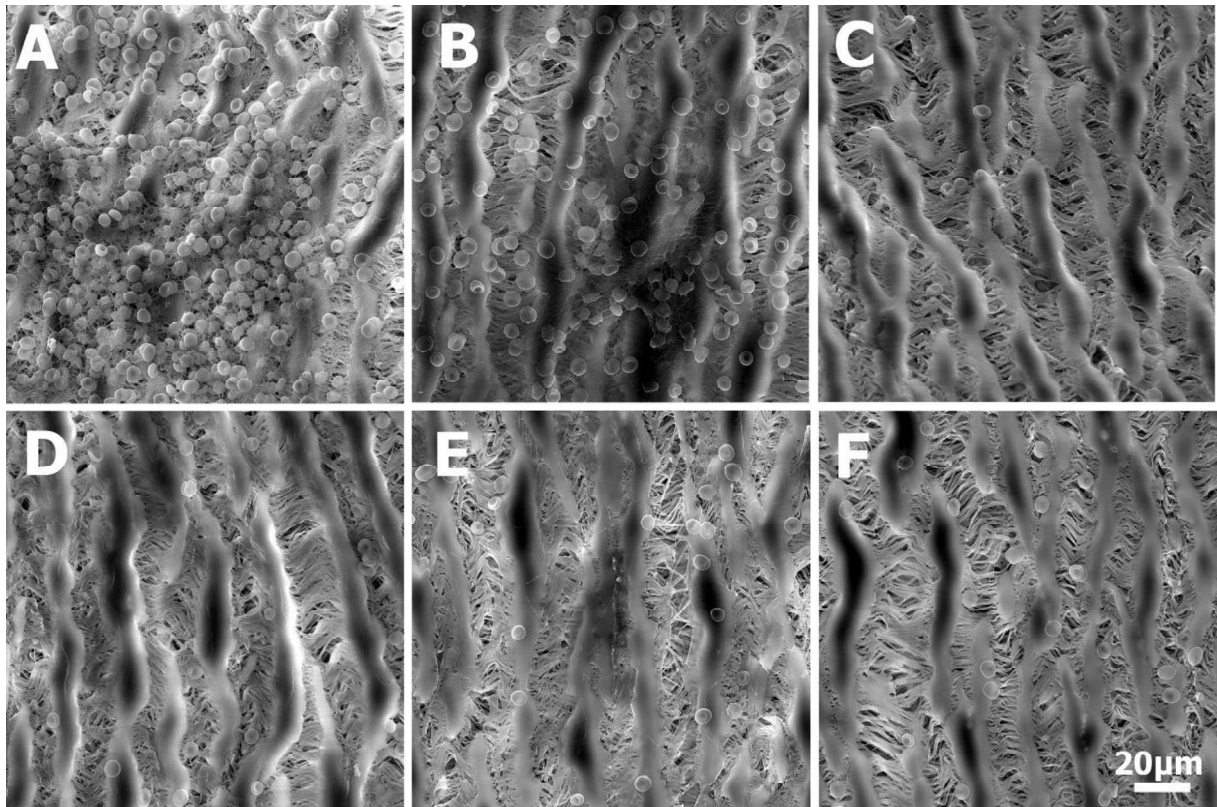

**Figure S3.** Inner surface of the unmodified and fibrin modified ePTFE vessel after 1 h contact with fresh heparinized (1 U/ml) human blood at 37°C. SEM images of A) unmodified ePTFE; B) Fb modified ePTFE; C) Fb/Hep modified ePTFE; D) Fb/Hep+FGF<sub>100</sub> modified ePTFE; E) Fb/Hep+VEGF<sub>100</sub> modified ePTFE; and F) Fb/Hep+FGF<sub>100</sub>+VEGF<sub>100</sub> modified ePTFE. SEM of dried samples.

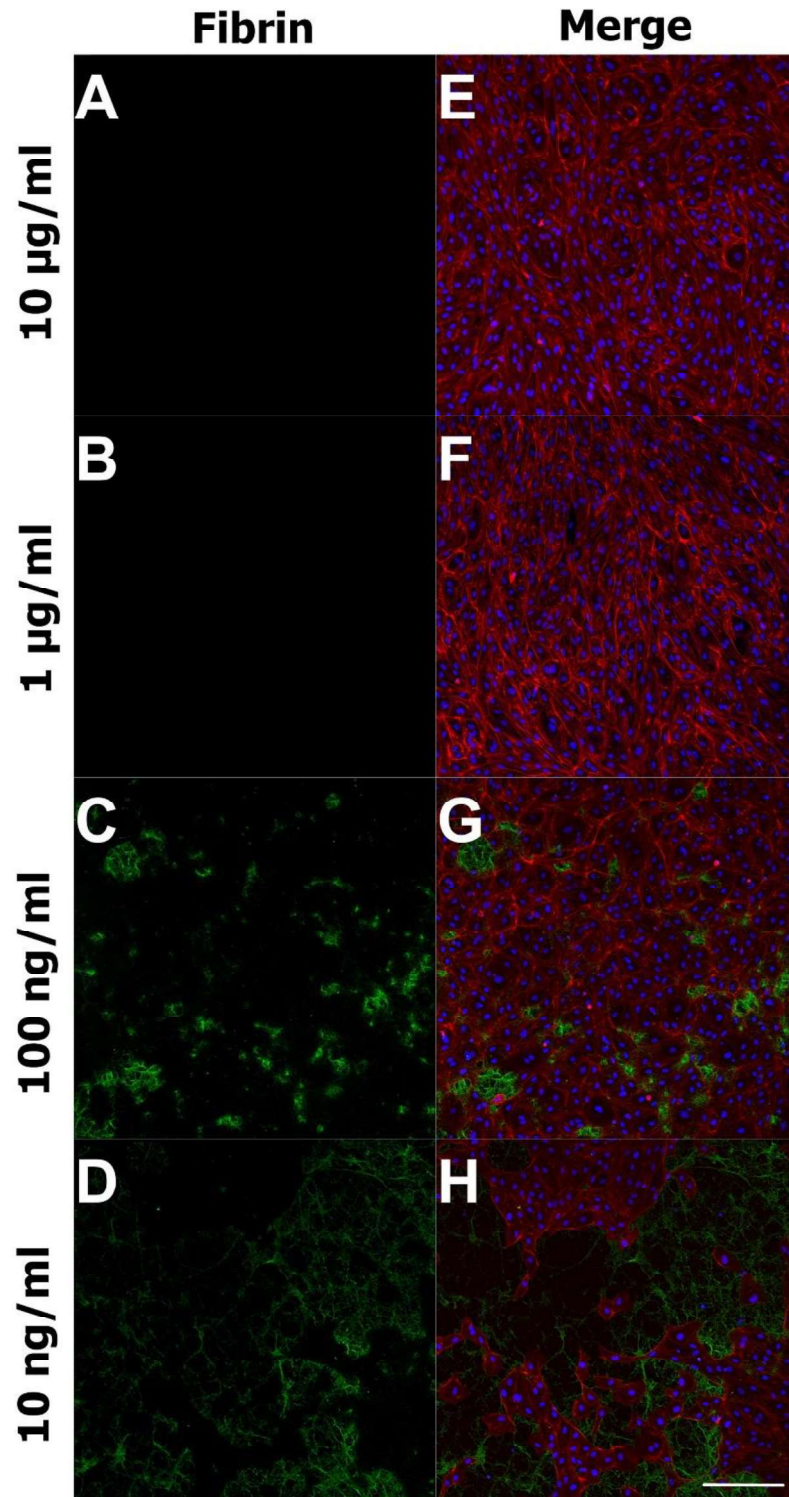

**Figure S4.** HUVEC on day 5 after seeding on the bare glass coated with the Fb/Hep coating containing increasing concentration of VEGF. The cells were stained with phalloidin for F-actin filaments (red) and with Hoechst for nuclei (blue); fibrin remaining on glass was immunofluorescence stained with Alexa 488 (green); confocal microscope scale bar 200  $\mu\text{m}$ .

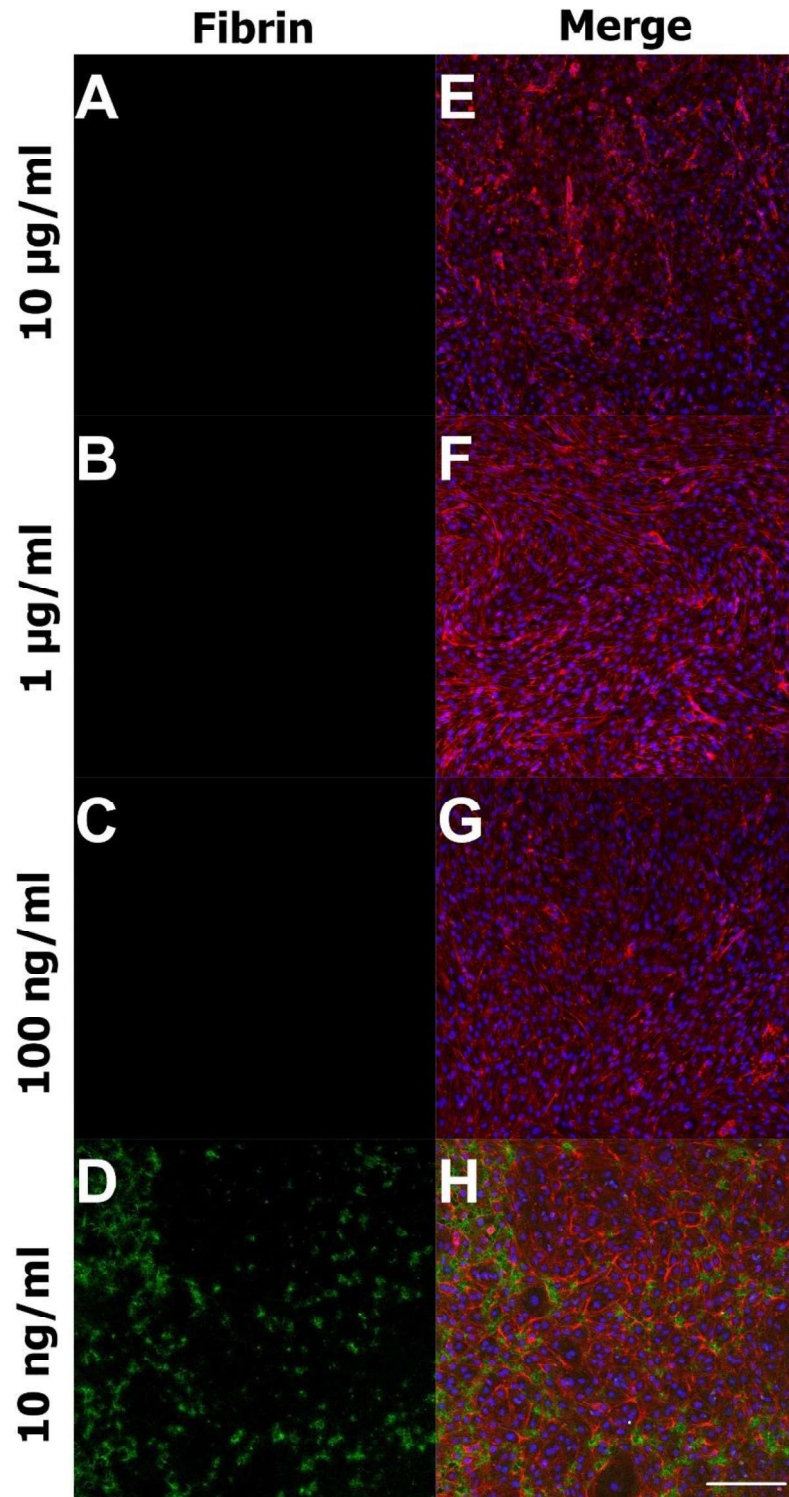

**Figure S5.** HUVEC on day 5 after seeding on bare glass coated with the Fb/Hep coating containing increasing concentration of FGF. The cells were stained with phalloidin for F-actin filaments (red) and with Hoechst for nuclei (blue); fibrin remaining on the glass was immunofluorescence stained with Alexa 488 (green); confocal microscope scale bar 200  $\mu\text{m}$ .



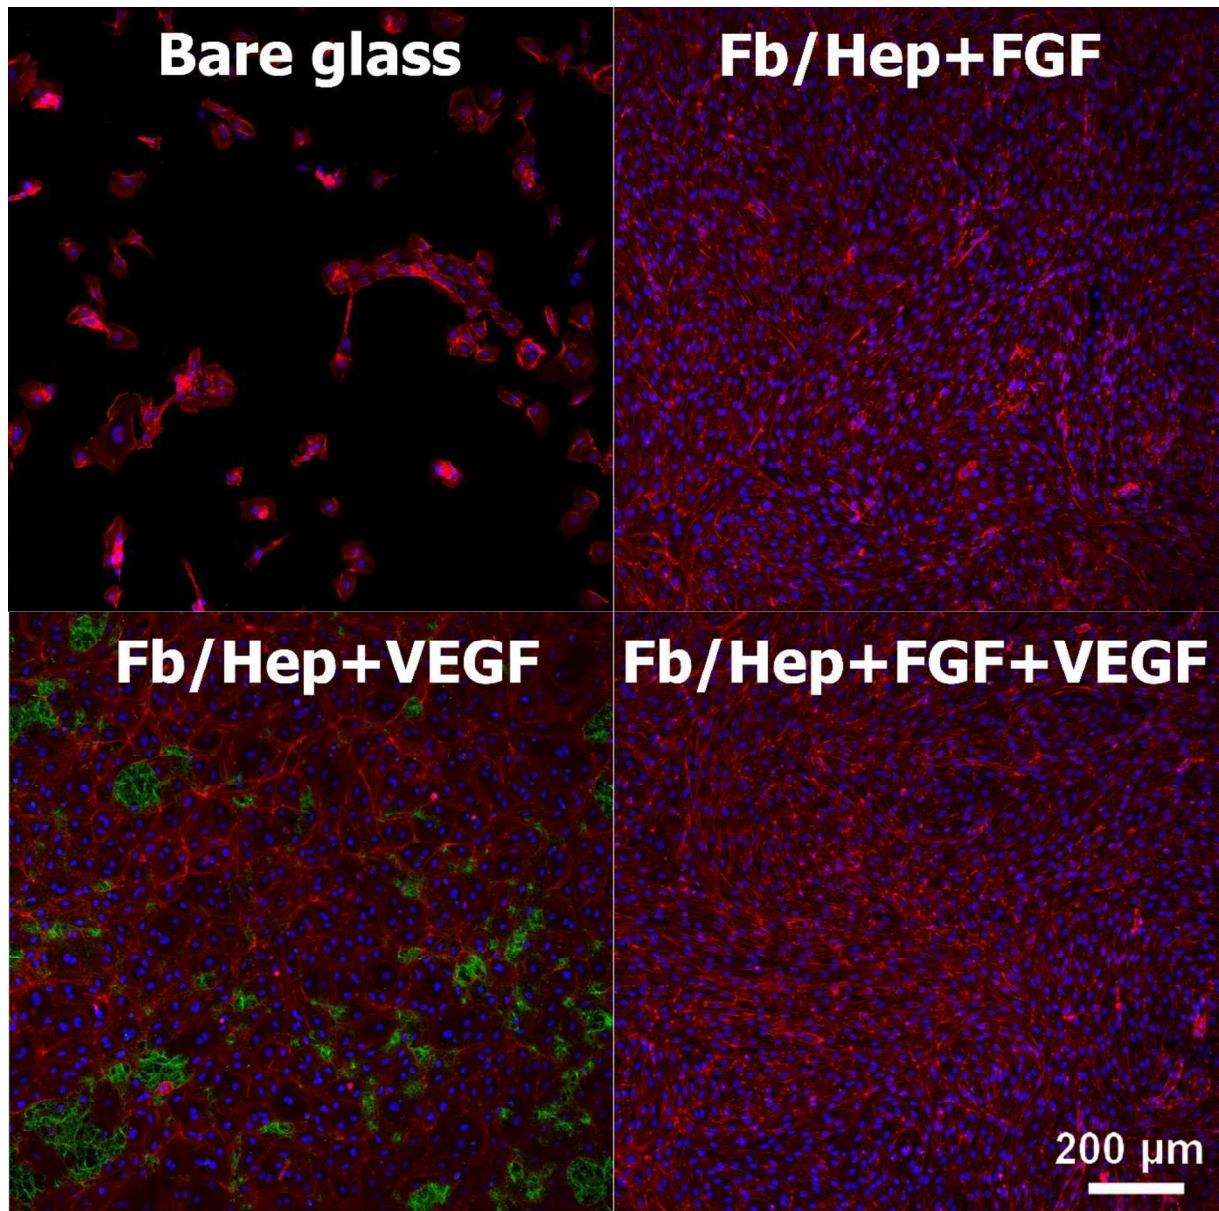

**Figure S6.** HUVEC on day 5 after seeding on bare glass; Fb/Hep+FGF; Fb/Hep+VEGF; Fb/Hep+FGF+VEGF. Both FGF and VEGF were deposited from a PBS solution at a concentration 100 ng/ml. The cells were stained with phalloidin for F-actin filaments (red) and with Hoechst for nuclei (blue); fibrin remaining on glass was immunofluorescence stained with Alexa 488 (green); confocal microscope scale bar 200  $\mu\text{m}$ .
